# Supplementary material
Source: HighWire-hosted journal article supplement (https://openres.ersjournals.com/content/7/2/00141-2021)

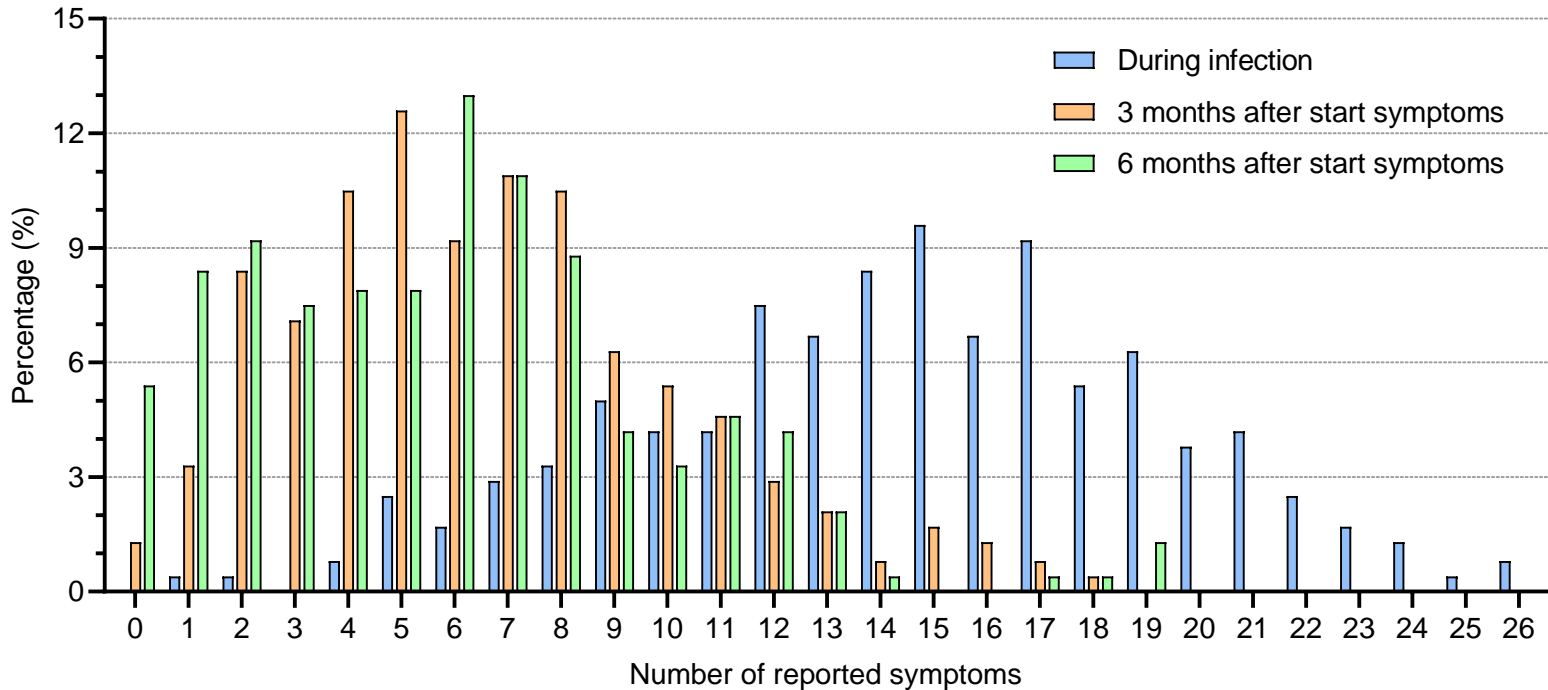

Supplement: inline-supplementary-material-3 [file inline-supplementary-material-3.pdf]
